# Supplementary material for: Ultra-highly sensitive detection of influenza virus by Localized surface-plasmon resonance sensor
Source: Research Square preprint supplement (doi:10.21203/rs.3.rs-879879/v1), 2021-09-10
Supplement: Supplementary file 1 [file e371a04306b2ce451b506bb5.docx]

**Supporting Information**

**Ultra-highly sensitive detection of influenza virus by Localized surface-plasmon resonance sensor**

Akira Monkawa*, Yuki Takimoto, Tomoe Nakagawa, Nagata Koki, Tomoko Gessei

*Tokyo Metropolitan Industrial Technology Research Institute, 2-4-10, Aomi, Kotoku, Tokyo 135-0064, Japan*

1. **Design of gold-dot pattern with high sensitivity**

**Figure S1** shows the local surface plasmon resonance (LSPR) spectrum calculated from the finite-difference time-domain (FDTD) simulation when the diameter (D) and pitch (P) of the gold (Au)-dot pattern were changed and when single model protein was placed on each Au-dot pattern surface. The Au dots had D and P ranging from 200 to 500 nm and from 400 to 1000 nm, respectively. The calculated LSPR peaks of D200P400, D250P500, D300P600, D350P700, D400P800, D450P900 and D500P1000 appeared at 791, 887, 1017, 1122, 1223, 1362 and 1499 nm, respectively. The LSPR peak position could be controlled by both D and P. The LSPR spectrum with a peak wavelength exceeding 1100 nm clearly shifted to the higher wavelength due to the capture of the model protein.

**Fig. S1** Simulated local surface plasmon resonance (LSPR) spectrum of the gold (Au)-dot patterns. The diameter and pitch (distance between centres of Au dots) of Au dot is represented by D and P. The wavy lines show the LSPR spectrum of the bare Au-dot pattern, and the solid lines show the LSPR spectrum with the adsorption of model protein on each Au-dot pattern surface.

**Figure S2** shows the correlation between the Au-dot pattern structure and the peak shift of the LSPR spectrum when the single model protein was placed on the Au-dot pattern surface. The peak shift of model protein capture became larger at the Au-dot pattern structure with a higher wavelength.

**Fig. S2** Simulated LSPR spectrum of Au-dot patterns in the P/D = 2.

**Figure S3** displays the estimated shifts of the LSPR spectra resulting from the adsorption of the model protein at different dot Ds and Ps. For Au-dot patterns with Ds larger than 300 nm, the amount of peak shift due to the adsorption increased as the dot P was separated.

**Fig. S3** The correlation between the Au-dot pattern structure and the peak shift in the LSPR spectrum (P/D = 2) with the adsorption of the model protein.

1. **Fabrication of gold-dot pattern chip by the nano-imprint method**

**Figure S4** presents the LSPR spectrum of the Au-dot pattern heated at 100 ℃ to 800 ℃. The peak position of the LSPR spectrum did not change below 100 ℃. It shifted to the lower wavelength at 200 ℃–500 ℃. The peak shift was about 15 nm at 200 ℃–300 ℃ and about 1 nm at 300 ℃–500 ℃. At 600 ℃ and 700 ℃, a decrease in the peak intensity was observed with increasing temperature. The LSPR spectrum disappeared at 800 ℃. The significant peak shift of the LSPR spectrum at the 200 ℃–300 ℃ was caused either by the change in the Au-dot shape or oxidation of the silicon (Si) underlayer. To find out the exact reason, the change in the Au-dot shape was investigated by atomic force microscopy (AFM) (**Fig. S5**). It was observed that the shape of the Au-dot pattern did not change when heated at 200 ℃ and 300 ℃. Such a result suggests that the change in Au-dot shape had no influence on the peak shift. The difference in the LSPR spectrum with Si and silicon dioxide (SiO2) underlayers was estimated by the FDTD simulation (**Fig. S6**). The peak position of the LSPR spectrum with the Si underlayer was shifted to a lower wavelength compared to that with the SiO2 underlayer. Such behaviour was attributed to the large peak shift of the LSPR spectrum at 200 ℃ and 300 ℃. Therefore, the large peak shift of the LSPR spectrum can be concluded to be caused by the oxidation of Si underlayer through heat treatment.

The mechanical strength of the Au-dot pattern with and without experiencing heating at 450 ℃ was revealed with their differences in resistance to the piranha and sonication treatments. The AFM and LSPR spectrum show that the Au-dot pattern without heating was disrupted by the piranha and sonication treatments, and a considerable decrease in the LSPR peak intensity. The Au-dot pattern with heating was not affected by piranha and ultrasonic treatment, and the LSPR peak intensity barely decreased.

**Fig. S4** Local surface plasmon resonance spectrum of the gold-dot pattern heated at 100 ℃–800 ℃.

**Fig. S5** Atomic force microscopy images of the gold-dot pattern chips after heating.

**Fig. S6** Simulated LSPR spectrum of the gold-dot pattern chips with silicon (Si) and silicon dioxide (SiO2) underlayers.

1. **Detection experiments of influenza virus using the gold-dot pattern chip**

**Figure S7** shows LSPR spectral change before and after recognition site immobilisation. The recognition site, i.e., sialic acid, was immobilised on all surfaces of the Au-dot pattern chip. Consequently, the LSPR spectrum was shifted by around 2 nm to a high wavelength.

**Fig. S7** LSPR spectral change before and after recognition site immobilisation.

1. **What led to the detection of the influenza virus with ultra-high sensitivity?**

**Figure S8** demonstrates the spectra of the normalised electric field intensity in the near-infrared wavelength ranging from 0.4 to 1.8 µm. In all spectra, small and large peaks were observed at 0.5–0.75 and 0.65–1.8 μm, respectively. For the same Au-dot D, the peak positions of large peaks were almost the same, and the peak intensity increased as the dot P expanded. As the Au-dot D increased, the peak positions shifted to the higher wavelength, and the peak areas also increased.

**Fig. S8** Electric field intensity (|E|2) simulated by finite-difference time-domain in the wavelength ranging from 0.4 to 1.8 µm of the gold-dot pattern chips.

**Figure S9** shows the FDTD simulation area of the Au-dot cross-section (Z section), while **Fig. S10** shows the electric field enhancement at the Z section. The electric field was remarkably enhanced in the rim of the Au dot along the electric field polarisation direction. The spread of the intensified electric field increased with an increase in P/D for the same D. **Figure S11** displays the respective electric field enhancements at the Z cross-section for P/D = 1.5, 1.75, 2, 2.25 and 2.5. The spread of the intensified electric field increases proportionally to the dot D.

**Fig. S9** Schematic illustration of the finite-difference time-domain (FDTD) simulation model for the gold (Au)-dot pattern chip.

**Fig. 10** FDTD simulations of the electromagnetic field intensity distribution in the Z section (A–B; **Fig. S9**) at the D = 200, 250, 300, 350, 400 and 450. The magnified images plotted the intensity distribution of 4 ±0.1 µm from the edge of the Au dot.

**Fig. 11** FDTD simulations of the electromagnetic field intensity distribution in the enlarged Z section (A–B; **Fig. S9**) at P/D = 1.5, 1.75, 2, 2.25, 2.5.
